# Supplementary material for: SWEETLEAD: an In Silico Database of Approved Drugs, Regulated Chemicals, and Herbal Isolates for Computer-Aided Drug Discovery
Source: PubMed Central journal article supplement (PMC3815155; doi:10.1371/journal.pone.0079568), 2013-11-01
Supplement: pone.0079568.s001.pdf [file pone.0079568.s001.pdf]

Step 1: Get Database IDs, and rank

| Database Queried | PubChem ID(s)                       | KEGG ID(s)                               | ChemSpider ID(s)                                 | DrugBank ID(s) | CHEBI ID(s)                  |
|------------------|-------------------------------------|------------------------------------------|--------------------------------------------------|----------------|------------------------------|
| PubChem          | 71313467                            |                                          |                                                  |                |                              |
| KEGG             | 107882                              | D02004                                   |                                                  | DB00714        |                              |
| ChemSpider       | 5702010,<br>10782, 9410,<br>6852389 |                                          | 4642402,<br>97017, 9039,<br>5254711,<br>23099928 |                | 31228                        |
| DrugBank         | 6005                                | D07460                                   |                                                  | DB00714        | 48538                        |
| PharmGKB         |                                     |                                          |                                                  |                |                              |
| Wikipedia        |                                     |                                          |                                                  |                |                              |
| Winner(s)        | <b>107882</b><br>(1.25 votes)       | <b>D02004,</b><br><b>D07460</b><br>(Tie) | <b>5 way tie</b>                                 | <b>DB00714</b> | <b>31228, 48538</b><br>(Tie) |

Step 2: Associate winning database IDs with standardized structures

| Structure                                                                          | PubChem ID(s) | KEGG ID(s)        | ChemSpider ID(s)           | DrugBank ID(s) | CHEBI ID(s)     |
|------------------------------------------------------------------------------------|---------------|-------------------|----------------------------|----------------|-----------------|
| 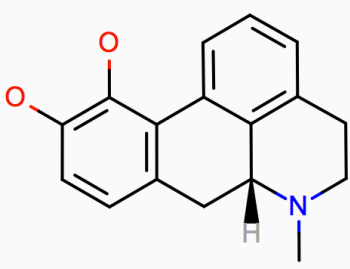 | 107882        | D07460,<br>D02004 | 9039,<br>2309928,<br>97017 | DB00714        | 31228,<br>48538 |
|  |               |                   | 5254711                    |                |                 |
|  |               |                   | 4642602                    |                |                 |

Step 3: Identify structure suggested by each database's winners (consensus)

| Structure                                                                         | PubChem ID(s) | KEGG ID(s)        | ChemSpider ID(s)           | DrugBank ID(s) | CHEBI ID(s)     |
|-----------------------------------------------------------------------------------|---------------|-------------------|----------------------------|----------------|-----------------|
| 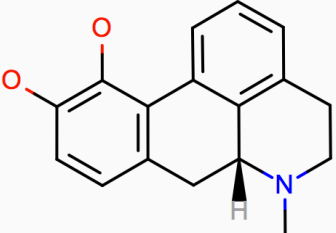 | 107882        | D07460,<br>D02004 | 9039,<br>2309928,<br>97017 | DB00714        | 31228,<br>48538 |

Step 4: Combine Apomorphine Hydrochloride results with Apomorphine results, since both return the same structure

| Structure                                                                           | PubChem ID(s)   | KEGG ID(s)        | ChemSpider ID(s)                 | DrugBank ID(s) | CHEBI ID(s)     |
|-------------------------------------------------------------------------------------|-----------------|-------------------|----------------------------------|----------------|-----------------|
| 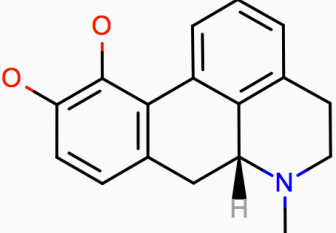 | 6005,<br>107882 | D07460,<br>D02004 | 5783, 9039,<br>2309928,<br>97017 | DB00714        | 31228,<br>48538 |
